# Supplementary material
Source: PubMed Central journal article supplement (PMC3367446)
Supplement: supp_dev.080705_DEV080705TableS1.pdf [file supp_dev.080705_DEV080705TableS1.pdf]

**Table S1. Primers for qRT-PCR**

| <b>Gene</b>     | <b>Forward</b>           | <b>Reverse</b>          |
|-----------------|--------------------------|-------------------------|
| <i>Axin2</i>    | TGACTCTCCTTCCAGATCCCA    | TGCCCACACTAGGCTGACA     |
| <i>cyclinD1</i> | GCGTACCCTGACACCAATCTC    | CTCCTCTTCGCACTTCTGCTC   |
| <i>myc</i>      | GCTCTCCATCCTATGTTGCGG    | TCCAAGTAACTCGGTCATCATCT |
| <i>Lef1</i>     | GCCACCGATGAGATGATCCC     | TTGATGTGCGGCTAAGTCGCC   |
| <i>Dkk1</i>     | CTCATCAATCCAACGCGATCA    | GCCCTCATAGAGAACTCCCG    |
| <i>Shh</i>      | AAAGCTGACCCCTTTAGCCTA    | TTCGGAGTTTCTTGTGATCTTCC |
| <i>Bmp4</i>     | GAGGAGTTTCCATCACGAAG     | TCTCCACTCCCTTGAGGTAA    |
| <i>Bmp9</i>     | TTCTACGCAGCCTTAACCT      | TTACGGCACTCGATACTTC     |
| <i>Wnt1</i>     | GAAGATGAACGCTGTTTCTCG    | AAATGGCAATTCCGAAACC     |
| <i>Wnt3a</i>    | TCACTGCGAAAGCTACTCCA     | CACCACCGTCAGCAACAG      |
| <i>Wnt7a</i>    | TGTGGTCCAGCACGTCTTAG     | TACACAATAACGAGGCGGGT    |
| <i>Wnt7b</i>    | CCAGGCCAGGAATCTTGTT      | ACGTGTTTCTCTGCTTTGGC    |
| <i>Wnt11</i>    | TCTGATTCAGTGCCAAGGCT     | TGCGAGGCTCTGCTCTTT      |
| <i>Fgf7</i>     | ACCTGAGGATTGACAAACGAGG   | CCACGGTCCTGATTTCCATGA   |
| <i>Fgf20</i>    | AGGATCACAGTCTCTTCGGTATC  | GTCATTCATCCCAAGGTACAGG  |
| <i>Gdnf</i>     | TCTTTCGATATTGCAGCGGTT    | GCCTACTTTGTCACTTGTTAGCC |
| <i>Bdnf</i>     | CCATAAGGACGCGGACTTGTA    | TTTGCGGCATCCAGGTAATTT   |
| <i>Cntf</i>     | GAAGATTCGTTTCAGACCTGACTG | GGAGGTTCTCTTGGAGTCGC    |
| <i>Nt3</i>      | AACGGACACAGAGCTACTACG    | CCATTAGGTATAAGGGAGGGGG  |
| <i>Hgf</i>      | ACTTCTGCCGGTCCTGTTG      | TGGGTCTTCCTTGGTAAGAGTAG |
| <i>Vegf</i>     | GCCAGACAGGGTTGCCATAC     | GGAGTGGGATGGATGATGTCAG  |
| <i>Sema3A</i>   | CGAGAAAATGCAATAGACGGAGA  | CGTGCTTTTAGGAATGTTGTCCA |
| <i>Sema3F</i>   | TGCTACCCCTATCCAGGACC     | CTGTAGTCTGTAGTGTGAGCAG  |
| <i>Sema4C</i>   | GAGATGTGGTGGAAACCTTG TG  | CAGGGTCAGTGT CAGGAAGTC  |
| <i>EphA3</i>    | TTCTCCATCTCCGGTGAAAACA   | ACCTCCCGACCAGAACATAGG   |
| <i>Slit1</i>    | GAAGTCAACGGCAACAACATC    | TCAGGCAACACTTGTAGCTGG   |
| <i>reelin</i>   | CTGTGTCATACGCCAAGAACA    | GGGGAGGTACAGGATGTGGAT   |
| <i>Gapdh</i>    | AGGTCGGTGTGAACGGATTTG    | GGGGTCGTTGATGGCAACA     |
